# Supplementary material for: Interaction of gold nanoclusters with IR light emitting cyanine dyes: a systematic fluorescence quenching study
Source: Royal Society of Chemistry journal article supplement (doi:10.1039/c4cp02563f), 2014-06-26
Supplement: c4cp02563f1.pdf [file c4cp02563f1.pdf]

## **Interaction of Gold Nanocluster with IR Light Emitting Cyanine Dye: A Systematic Fluorescence Study**

Chiranjib Banerjee, Jagannath Kuchlyan, Debasis Banik, Niloy Kundu, Arpita Roy, Surajit Ghosh, Nilmoni Sarkar\*

Department of Chemistry, Indian Institute of Technology, Kharagpur 721302, WB, India

E-mail: [nilmoni@chem.iitkgp.ernet.in](mailto:nilmoni@chem.iitkgp.ernet.in)

Fax: 91-3222-255303

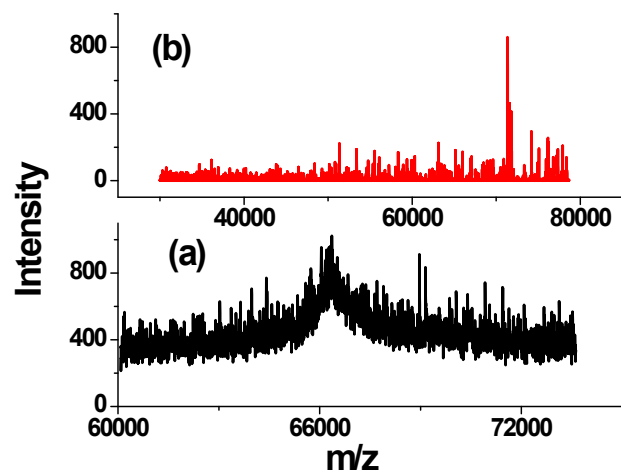

**Figure S1.** MALDI-TOF mass spectra of BSA (a) and BSA-Au NCs (b).

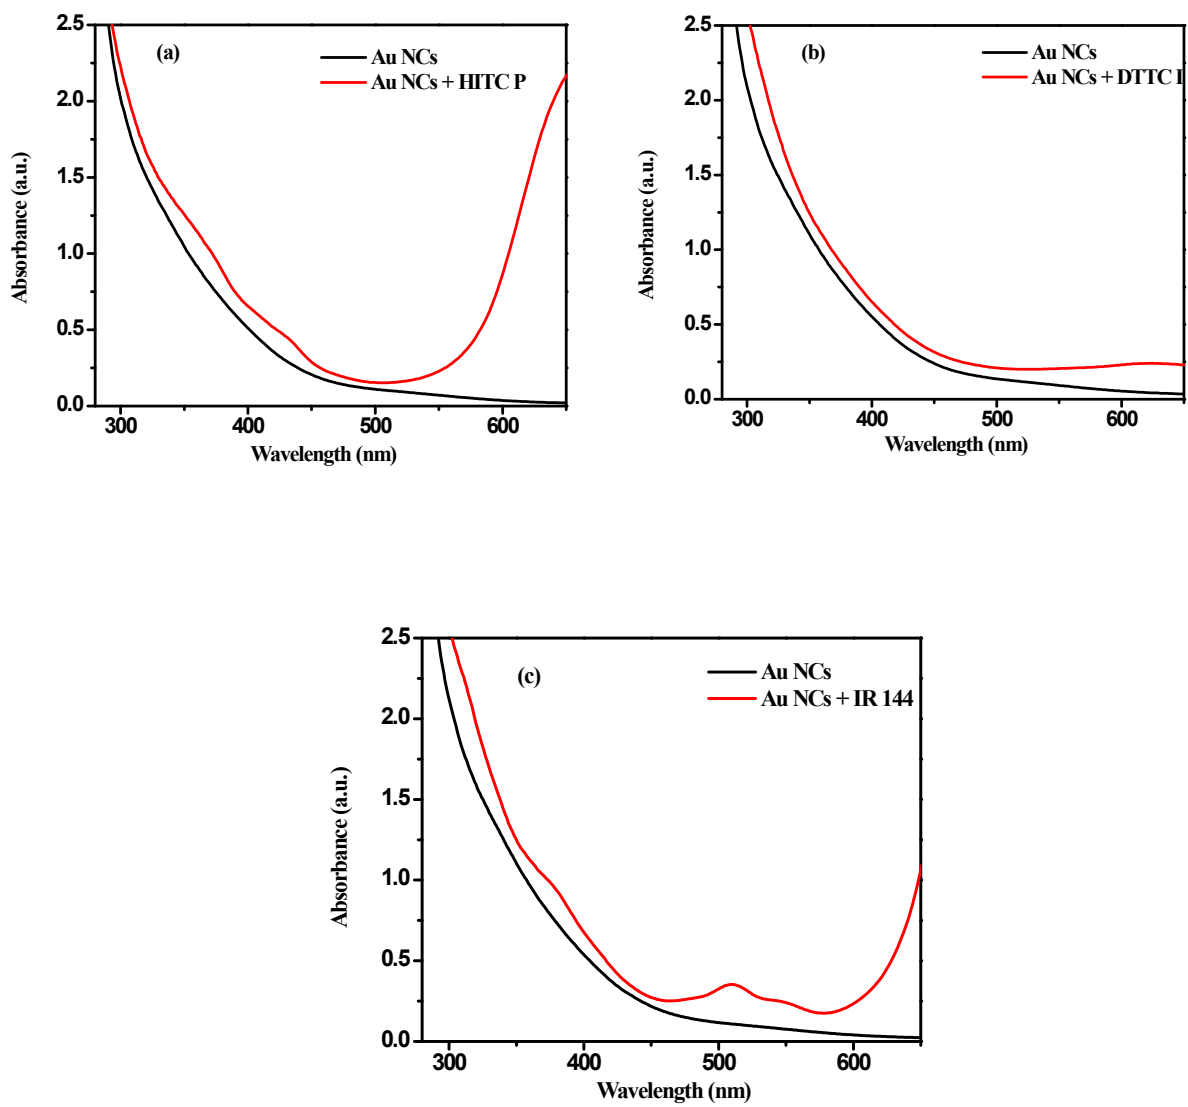

**Figure S2.** UV-visible spectra of Au NCs in absence and presence of HITC P (a), DTTC I (b), and IR 144 (c).

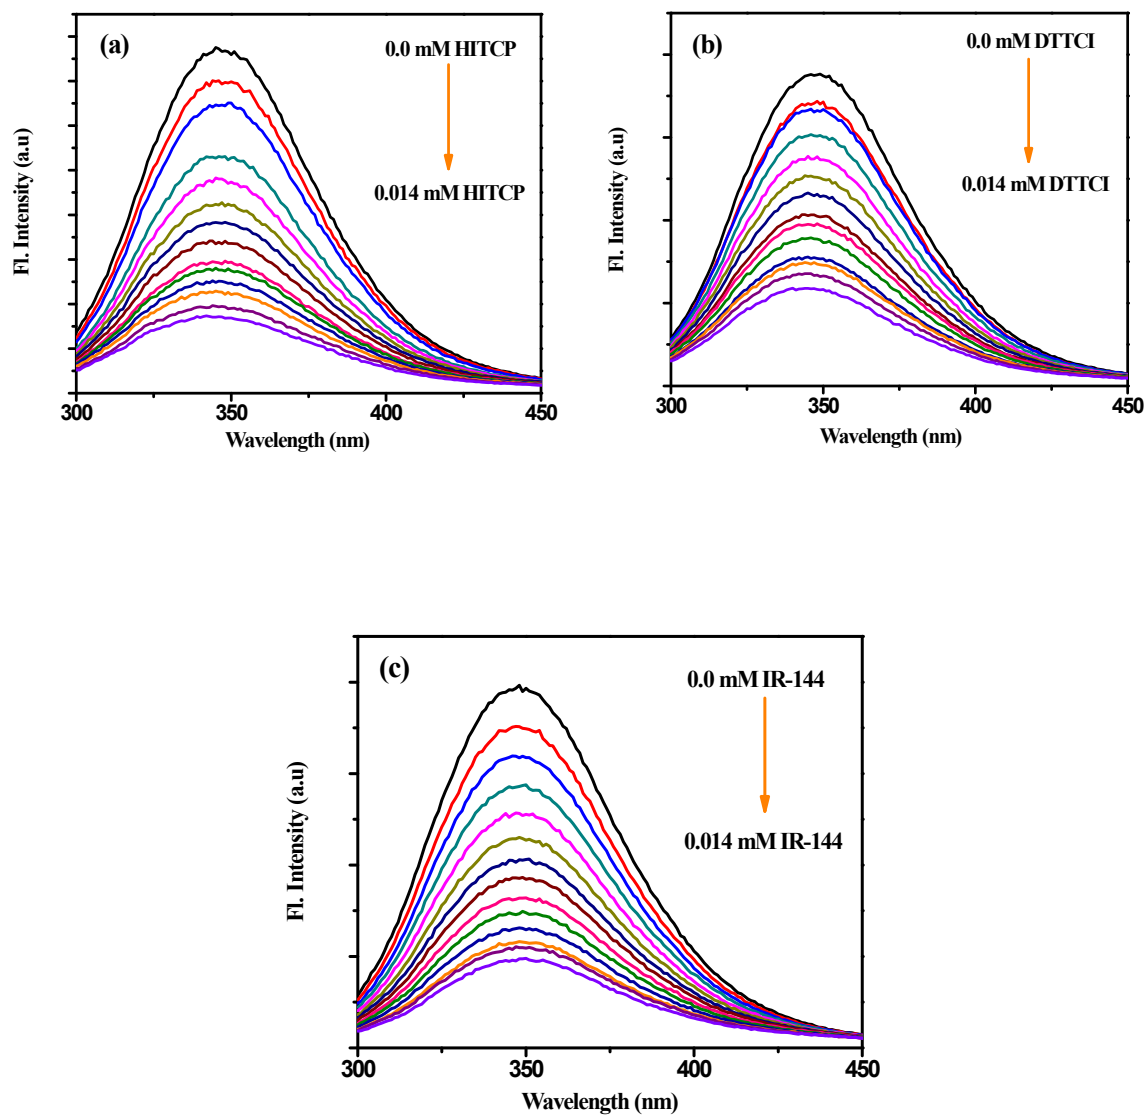

**Figure S3.** Emission spectra of BSA in the presence of different concentrations of cyanine dyes; (a) HITC P, (b) DTTC I, (c) IR 144 in pH 7.4 at 298 K.

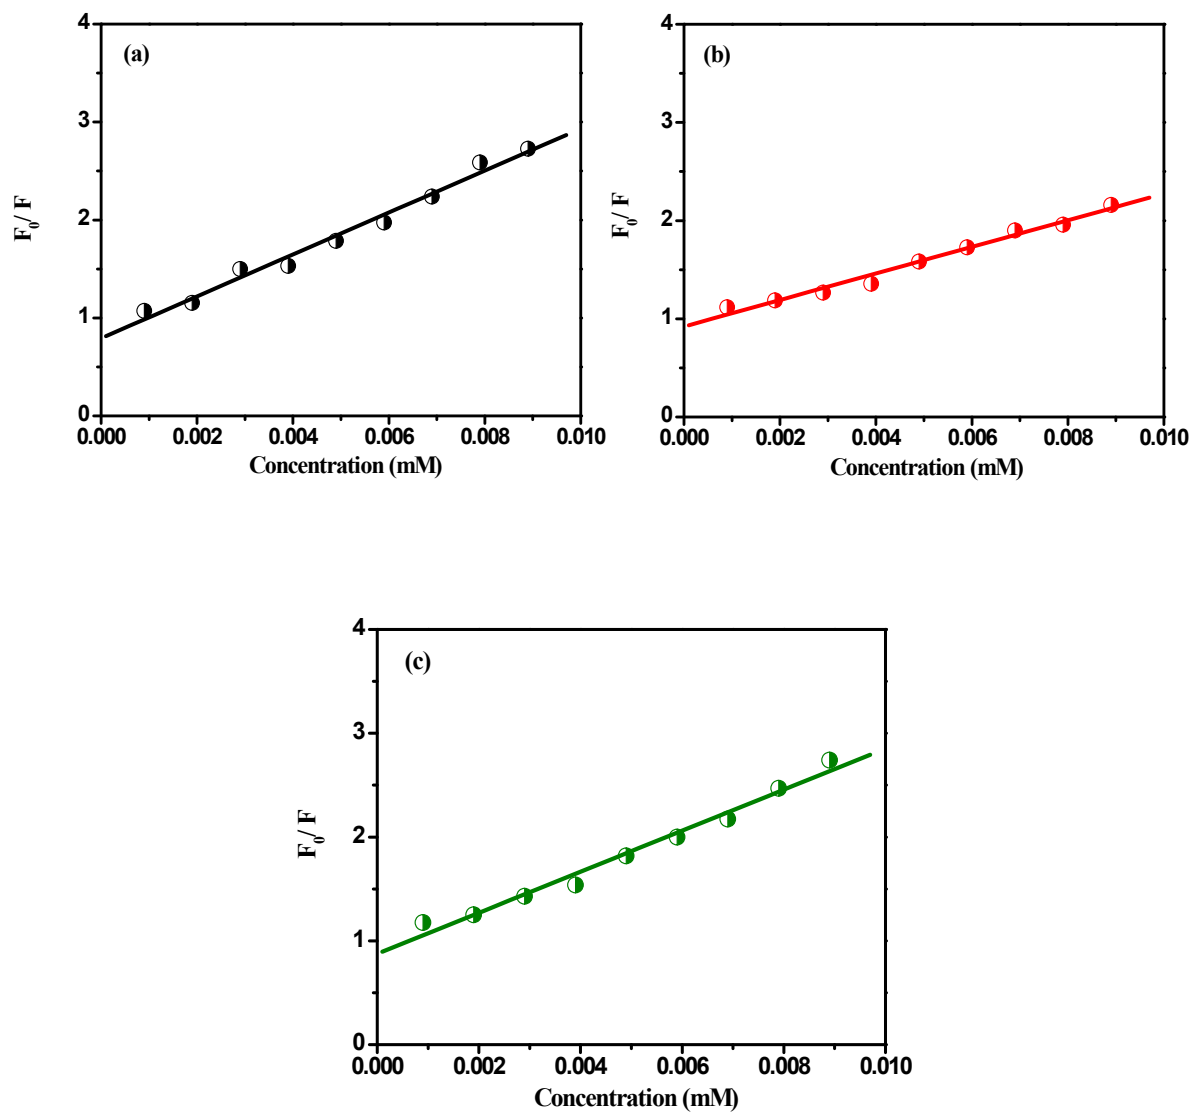

**Figure S4.**  $F_0/F$  vs concentration of quencher plot; (a) HITC P, (b) DTTC I, (c) IR 144 with BSA protein at pH 7.4.
